# Supplementary material
Source: HighWire-hosted journal article supplement (https://erj.ersjournals.com/content/59/4/2100905)
Supplement: inline-supplementary-material-2 [file inline-supplementary-material-2.pdf]

## Supplementary Appendix 2

**Supplementary table 1.** Study schema for discovery, internal and external validation analyses.

|                                    | <b>Discovery</b>                                     | <b>Internal validation</b>                           | <b>External validation 1</b>                          | <b>External validation 2</b>                                | <b>Pooled validation</b>                              |
|------------------------------------|------------------------------------------------------|------------------------------------------------------|-------------------------------------------------------|-------------------------------------------------------------|-------------------------------------------------------|
| <b>Setting</b>                     | Pune, India                                          | Pune, India                                          | Chennai, India                                        | Khayelitsha, South Africa                                   | India and South Africa                                |
| <b>Design</b>                      | Prospective cohort study                             | Case-control analysis                                | Case-control analysis                                 | Case-control analysis                                       | Case-control analysis                                 |
| <b>Sample size</b>                 | 30 adults with drug-sensitive pulmonary tuberculosis | 40 adults with drug-sensitive pulmonary tuberculosis | 194 adults with drug-sensitive pulmonary tuberculosis | 129 adults with rifampicin sensitive pulmonary tuberculosis | 363 adults with drug-sensitive pulmonary tuberculosis |
| <b>Treatment outcomes</b>          | 4 with failure                                       | 20 with failure                                      | 18 with failure, 35 with recurrence and 19 deaths     | 9 with failure, 4 with recurrence and 5 deaths              | 47 with failure, 39 with recurrence and 24 deaths     |
| <b>HIV coinfection, n (%)</b>      | 2 (7%)                                               | 3 (8%)                                               | 0                                                     | 76 (59%)                                                    | 79 (22%)                                              |
| <b>Diabetes comorbidity, n (%)</b> | 7 (23%)                                              | 3 (8%)                                               | 115 (59%)                                             | 10 (8%)                                                     | 128 (35%)                                             |
| <b>Laboratory</b>                  | NIH-NIRT-ICER, Chennai                               | BJGMC, Pune                                          | NIH-NIRT-ICER, Chennai                                | Wellcome Center, Cape Town                                  | BJGMC, NIH-NIRT-ICER and Wellcome Center              |

**Supplementary table 2.** Baseline characteristics and treatment outcomes of participants in the full cohort and those selected in the random sub-cohort for discovery analysis.

| <b>Characteristics</b>                               | <b>Full cohort<br/>(n=445)</b> | <b>Sub-cohort<br/>(n=30)</b> | <b>p-value</b> |
|------------------------------------------------------|--------------------------------|------------------------------|----------------|
| Age in years, median (IQR)                           | 38 (27-49)                     | 35 (28-51)                   | 0.95           |
| Male sex, n (%)                                      | 286 (64)                       | 21 (70)                      | 0.69           |
| BMI in kg/m <sup>2</sup> , median (IQR)              | 17.7 (15.8-20.4)               | 18.0 (15.8-19.9)             | 0.97           |
| Ever-smokers, n (%)                                  | 144 (32)                       | 8 (27)                       | 0.68           |
| HIV coinfection, n (%)                               | 33 (8)                         | 2 (7)                        | 0.99           |
| Diabetes, n (%)                                      | 99 (22)                        | 7 (23)                       | 0.82           |
| Pre-treatment illness duration in days, median (IQR) | 45 (30-90)                     | 60 (20-90)                   | 0.59           |
| Percent of lung fields affected on CXR, median (IQR) | 60 (25-80)                     | 50 (24-68)                   | 0.30           |
| Cavitation on CXR, n (%)                             | 167 (45)                       | 10 (40)                      | 0.68           |
| Culture confirmed TB, n (%)                          | 368 (84)                       | 27 (90)                      | 0.45           |
| Smear positive TB, n (%)                             | 305 (69)                       | 20 (67)                      | 0.84           |
| Treatment outcomes, n (%)                            |                                |                              |                |
| Failure                                              | 45 (10)                        | 4 (13)                       | 0.99           |
| Recurrence                                           | 22 (5)                         | 0                            | -              |
| Death                                                | 20 (4)                         | 0                            | -              |

TB – tuberculosis, IQR – interquartile range, BMI – body mass index, CXR – chest radiograph, n – sample size.

**Supplementary table 3.** Baseline characteristics of culture confirmed tuberculosis patients who failed treatment (cases) and those who were cured (controls) in the internal validation cohort.

| <b>Characteristics</b>                               | <b>Cases<br/>(n=20)</b> | <b>Controls<br/>(n=20)</b> | <b>p-value</b> |
|------------------------------------------------------|-------------------------|----------------------------|----------------|
| Age in years, median (IQR)                           | 27 (20-32)              | 26 (20-32)                 | 0.92           |
| Male sex, n (%)                                      | 15 (75)                 | 15 (75)                    | 0.99           |
| BMI in kg/m <sup>2</sup> , median (IQR)              | 16.0 (14.2-17.7)        | 17.4 (15.8-19.1)           | 0.02           |
| Ever-smokers, n (%)                                  | 6 (30)                  | 5 (25)                     | 0.99           |
| Alcohol dependence, n (%)                            | 9 (45)                  | 7 (35)                     | 0.74           |
| HIV coinfection, n (%)                               | 2 (10)                  | 1 (5)                      | 0.99           |
| Diabetes, n (%)                                      | 1 (5)                   | 2 (10)                     | 0.99           |
| Pre-treatment illness duration in days, median (IQR) | 35 (28-68)              | 30 (15-45)                 | 0.03           |
| Percent of lung fields affected on CXR, median (IQR) | 58 (38-78)              | 60 (23-73)                 | 0.43           |
| Cavitation on CXR, n (%)                             | 8 (40)                  | 8 (40)                     | 0.99           |
| Smear positive TB, n (%)                             | 14 (70)                 | 11 (55)                    | 0.51           |

TB – tuberculosis, IQR – interquartile range, BMI – body mass index, CXR – chest radiograph, n – sample size.

**Supplementary table 4.** Baseline characteristics of tuberculosis patients who experienced an unfavorable treatment outcome (cases) and those who were cured (controls) in the Indian external validation cohort.

| <b>Characteristics</b>                               | <b>Cases<br/>(n=72)</b> | <b>Controls<br/>(n=122)</b> | <b>p-value</b> |
|------------------------------------------------------|-------------------------|-----------------------------|----------------|
| Age in years, median (IQR)                           | 45 (39-52)              | 45 (36-50)                  | 0.40           |
| Male sex, n (%)                                      | 64 (89)                 | 104 (85)                    | 0.52           |
| BMI in kg/m <sup>2</sup> , median (IQR)              | 16.8 (15.2-18.9)        | 17.2 (15.4-19.2)            | 0.58           |
| Ever-smokers, n (%)                                  | 41 (57)                 | 50 (41)                     | 0.03           |
| Diabetes, n (%)                                      | 42 (58)                 | 73 (59)                     | 0.88           |
| Pre-treatment illness duration in days, median (IQR) | 4 (4-8)                 | 5 (4-8)                     | 0.56           |
| Percent of lung fields affected on CXR, median (IQR) | 26 (15-40)              | 24 (14-40)                  | 0.36           |
| Cavitation on CXR, n (%)                             | 18 (31)                 | 30 (32)                     | 0.99           |
| Smear positive TB, n (%)                             | 61 (91)                 | 94 (90)                     | 0.80           |
| Culture confirmed TB, n (%)                          | 64 (96)                 | 104 (98)                    | 0.40           |

TB – tuberculosis, IQR – interquartile range, BMI – body mass index, CXR – chest radiograph, n – sample size.

**Supplementary table 5.** Baseline characteristics of TB patients who experienced an unfavorable treatment outcome and those who were cured in the South African external validation cohort.

| <b>Characteristics</b>                  | <b>Unfavorable outcome<br/>(n=18)</b> | <b>Cure (n=111)</b> | <b>p-value</b> |
|-----------------------------------------|---------------------------------------|---------------------|----------------|
| Age in years, median (IQR)              | 36 (30-48)                            | 35 (30-43)          | 0.78           |
| Male sex, n (%)                         | 11 (61)                               | 63 (57)             | 0.80           |
| BMI in kg/m <sup>2</sup> , median (IQR) | 19.9 (19.0-23.0)                      | 21.0 (19.1-23.3)    | 0.15           |
| Ever-smokers, n (%)                     | 8 (44)                                | 52 (47)             | 0.99           |
| Cavitation on CXR, n (%)                | 7 (39)                                | 60 (54)             | 0.31           |
| HIV coinfection, n (%)                  | 13 (72)                               | 63 (57)             | 0.30           |
| ART receipt, n (%)                      | 7 (39)                                | 22 (20)             | 0.12           |
| CD4 count, median (IQR)                 | 178 (61-594)                          | 194 (69-364)        | 0.98           |
| Smear positive TB, n (%)                | 9 (50)                                | 82 (74)             | 0.05           |

TB – tuberculosis, IQR – interquartile range, BMI – body mass index, CXR – chest radiograph, n – sample size, ART – antiretroviral therapy.

**Supplementary table 6.** Discriminatory ability of baseline IL-6 added to a risk-prediction model for unfavorable tuberculosis treatment outcomes.

| <b>Baseline variables in the prediction model</b>                         | <b>AUC (95%CI) excluding baseline IL-6</b> | <b>AUC (95%CI) including baseline IL-6</b> | <b>p-value for gain in AUC by baseline IL-6</b> |
|---------------------------------------------------------------------------|--------------------------------------------|--------------------------------------------|-------------------------------------------------|
| Cavitation on CXR                                                         | 0.52 (0.46-0.57)                           | 0.68 (0.62-0.74)                           | <0.001                                          |
| Smear grade $\geq 2$                                                      | 0.50 (0.45-0.55)                           | 0.65 (0.59-0.71)                           | <0.001                                          |
| BMI $\leq 18.5$ kg/m <sup>2</sup>                                         | 0.60 (0.51-0.70)                           | 0.72 (0.62-0.82)                           | 0.002                                           |
| Cavitation and smear grade $\geq 2$ and BMI $\leq 18.5$ kg/m <sup>2</sup> | 0.66 (0.56-0.77)                           | 0.76 (0.67-0.85)                           | 0.02                                            |

AUC – area under the curve calculated by the C-statistic, CI – confidence interval, BMI – body mass index.
