# Supplementary material
Source: HighWire-hosted journal article supplement (https://erj.ersjournals.com/content/59/4/2100905)
Supplement: inline-supplementary-material-3 [file inline-supplementary-material-3.pdf]

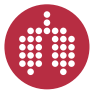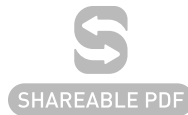

# Baseline IL-6 is a biomarker for unfavourable tuberculosis treatment outcomes: a multisite discovery and validation study

Akshay N. Gupte<sup>1,2</sup>, Pavan Kumar<sup>3</sup>, Mariana Araújo-Pereira<sup>4,5,6</sup>, Vandana Kulkarni<sup>2,7,8</sup>, Mandar Paradkar<sup>2,7,8</sup>, Neeta Pradhan<sup>2,7,8</sup>, Pradeep Menon<sup>3</sup>, Chandrasekaran Padmapriyadarsini<sup>3</sup>, Luke-Elizabeth Hanna<sup>3</sup>, Shri Vijay Bala Yogendra Shivakumar<sup>8</sup>, Neesha Rockwood<sup>9,10,11</sup>, Elsa Du Bruyn<sup>9,12</sup>, Rajesh Karyakarte<sup>13</sup>, Sanjay Gaikwad<sup>14</sup>, Robert Bollinger<sup>1,2</sup>, Jonathan Golub<sup>1,15</sup>, Nikhil Gupte<sup>1,2</sup>, Vijay Viswanathan<sup>16</sup>, Robert J. Wilkinson<sup>9,11,12,17</sup>, Vidya Mave<sup>1,2</sup>, Subash Babu<sup>18</sup>, Hardy Kornfeld<sup>19</sup>, Bruno B. Andrade<sup>4,5,6</sup> and Amita Gupta<sup>1,2</sup>

<sup>1</sup>Division of Infectious Diseases, Johns Hopkins University School of Medicine, Baltimore, MD, USA. <sup>2</sup>Center for Clinical Global Health Education, Johns Hopkins University School of Medicine, Baltimore, MD, USA. <sup>3</sup>National Institute for Research in Tuberculosis, Chennai, India. <sup>4</sup>Instituto Gonçalo Moniz, Fundação Oswaldo Cruz (FIOCRUZ), Salvador, Brazil. <sup>5</sup>Multinational Organization Network Sponsoring Translational and Epidemiological Research, Salvador, Brazil. <sup>6</sup>Faculdade de Medicina, Universidade Federal da Bahia, Salvador, Brazil. <sup>7</sup>Byramjee-Jeejeebhoy Government Medical College – Johns Hopkins University Clinical Research Site, Pune, India. <sup>8</sup>Johns Hopkins India Private Limited, Pune, India. <sup>9</sup>Wellcome Centre for Infectious Disease Research in Africa, Institute of Infectious Disease and Molecular Medicine, University of Cape Town, Cape Town, South Africa. <sup>10</sup>Dept of Microbiology, Faculty of Medicine, University of Colombo, Colombo, Sri Lanka. <sup>11</sup>Dept of Infectious Diseases, Imperial College London, London, UK. <sup>12</sup>Dept of Infectious Diseases, University of Cape Town, Cape Town, South Africa. <sup>13</sup>Dept of Microbiology, Byramjee-Jeejeebhoy Government Medical College, Pune, India. <sup>14</sup>Dept of Pulmonary Medicine, Byramjee-Jeejeebhoy Government Medical College, Pune, India. <sup>15</sup>Center for Tuberculosis Research, Johns Hopkins University, Baltimore, MD, USA. <sup>16</sup>Professor M. Viswanathan Diabetes Research Centre, Chennai, India. <sup>17</sup>The Francis Crick Institute, London, UK. <sup>18</sup>National Institutes of Health – National Institute for Research in Tuberculosis – International Center for Excellence in Research, Chennai, India. <sup>19</sup>Division of Pulmonary Medicine, University of Massachusetts Medical School, Worcester, MA, USA.

Corresponding author: Akshay N. Gupte ([agupte1@jhmi.edu](mailto:agupte1@jhmi.edu))

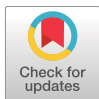

Shareable abstract (@ERSpublications)

**Pre-treatment IL-6 is a biomarker for unfavourable tuberculosis treatment outcomes independent of disease severity and improves the performance of risk prediction models comprised of established clinical predictors** <https://bit.ly/38394xE>

**Cite this article as:** Gupte AN, Kumar P, Araújo-Pereira M, *et al.* Baseline IL-6 is a biomarker for unfavourable tuberculosis treatment outcomes: a multisite discovery and validation study. *Eur Respir J* 2022; 59: 2100905 [DOI: 10.1183/13993003.00905-2021].

This single-page version can be shared freely online.

## Abstract

**Background** Biomarkers of unfavourable tuberculosis (TB) treatment outcomes are needed to accelerate new drug and regimen development. Whether plasma cytokine levels can predict unfavourable TB treatment outcomes is unclear.

**Methods** We identified and internally validated the association between 20 *a priori* selected plasma inflammatory markers and unfavourable treatment outcomes of failure, recurrence and all-cause mortality among adults with drug-sensitive pulmonary TB in India. We externally validated these findings in two independent cohorts of predominantly diabetic and HIV co-infected TB patients in India and South Africa, respectively.

**Results** Pre-treatment interferon- $\gamma$ , interleukin (IL)-13 and IL-6 were associated with treatment failure in the discovery analysis. Internal validation confirmed higher pre-treatment IL-6 concentrations among failure cases compared with controls. External validation among predominantly diabetic TB patients found an association between pre-treatment IL-6 concentrations and subsequent recurrence and death. Similarly, external validation among predominantly HIV co-infected TB patients found an association between pre-treatment IL-6 concentrations and subsequent treatment failure and death. In a pooled analysis of 363 TB cases from the Indian and South African validation cohorts, high pre-treatment IL-6 concentrations were associated with higher risk of failure (adjusted OR (aOR) 2.16, 95% CI 1.08–4.33;  $p=0.02$ ), recurrence

Copyright ©The authors 2022.  
For reproduction rights and  
permissions contact  
[permissions@ersnet.org](mailto:permissions@ersnet.org)

Received: 7 April 2021  
Accepted: 18 Aug 2021

(aOR 5.36, 95% CI 2.48–11.57;  $p < 0.001$ ) and death (aOR 4.62, 95% CI 1.95–10.95;  $p < 0.001$ ). Adding baseline IL-6 to a risk prediction model comprised of low body mass index, high smear grade and cavitation improved model performance by 15% (C-statistic 0.66 *versus* 0.76;  $p = 0.02$ ).

**Conclusions** Pre-treatment IL-6 is a biomarker for unfavourable TB treatment outcomes. Future studies should identify optimal IL-6 concentrations for point-of-care risk prediction.
